# Supplementary material for: Upregulation of SPDEF is associated with poor prognosis in prostate cancer
Source: PubMed Central journal article supplement — Oncol Lett. 2019 Sep 19;18(5):5107–18. doi: 10.3892/ol.2019.10885 (PMC6781494; doi:10.3892/ol.2019.10885), 2019-09-19
Supplement: Supplementary_Data.pdf [file Supplementary_Data.pdf]

Figure S1. Western blot analysis of SPDEF expression in DU-145 prostate cancer cells with MAB9916 clone 4A5. SPDEF, SAM pointed domain-containing Ets transcription factor.

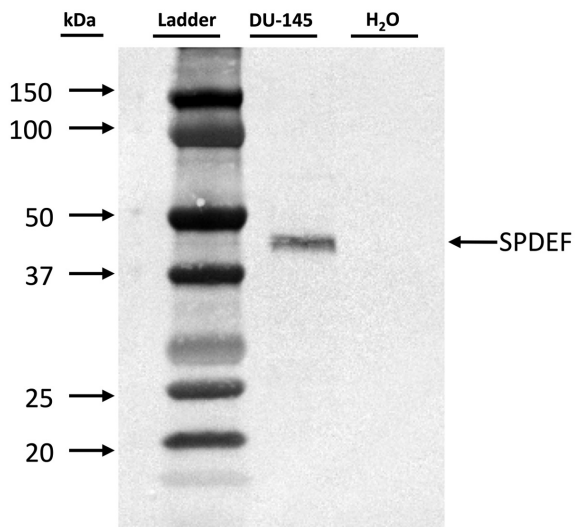

Table SI. Cox proportional hazards for PSA recurrence-free survival after prostatectomy of established preoperative prognostic parameter and SPDEF expression.

| Variable               | Comparison          | Number, n | Univariate analysis           | Multivariate analysis (n=8,336) |
|------------------------|---------------------|-----------|-------------------------------|---------------------------------|
| Gleason grade biopsy   | ≥4+4 vs. ≤3+3       | 12,172    | 5.91 (5.33-6.55) <sup>c</sup> | 4.16 (3.67-4.72) <sup>c</sup>   |
| cT-stage               | T3a vs. T1c         | 14,404    | 2.15 (1.72-2.65) <sup>c</sup> | 1.40 (1.05-1.83) <sup>a</sup>   |
| Preoperative PSA-level | ≥20 vs. <4          | 14,611    | 5.06 (4.41-5.81) <sup>c</sup> | 3.50 (2.90-4.24) <sup>c</sup>   |
| SPDEF expression       | Strong vs. negative | 8,630     | 1.99 (1.72-2.30) <sup>c</sup> | 1.66 (1.43-1.93) <sup>c</sup>   |
| ERG negative subset    | Strong vs. negative | 4,166     | 2.51 (2.03-3.10) <sup>c</sup> | -                               |
| ERG positive subset    | Strong vs. negative | 3,443     | 1.70 (1.25-2.35) <sup>b</sup> | -                               |

<sup>a</sup>P≤0.05, <sup>b</sup>P≤0.001, <sup>c</sup>P≤0.0001. The confidence interval (95%) is indicated in brackets. ERG, ETS-related gene; PSA, prostate-specific antigen; SPDEF, SAM pointed domain-containing Ets transcription factor.
